# Supplementary material
Source: PubMed Central journal article supplement (PMC7242709)
Supplement: supp_RA119.011932_157171_3_supp_504958_q87gqj.pdf [file supp_RA119.011932_157171_3_supp_504958_q87gqj.pdf]

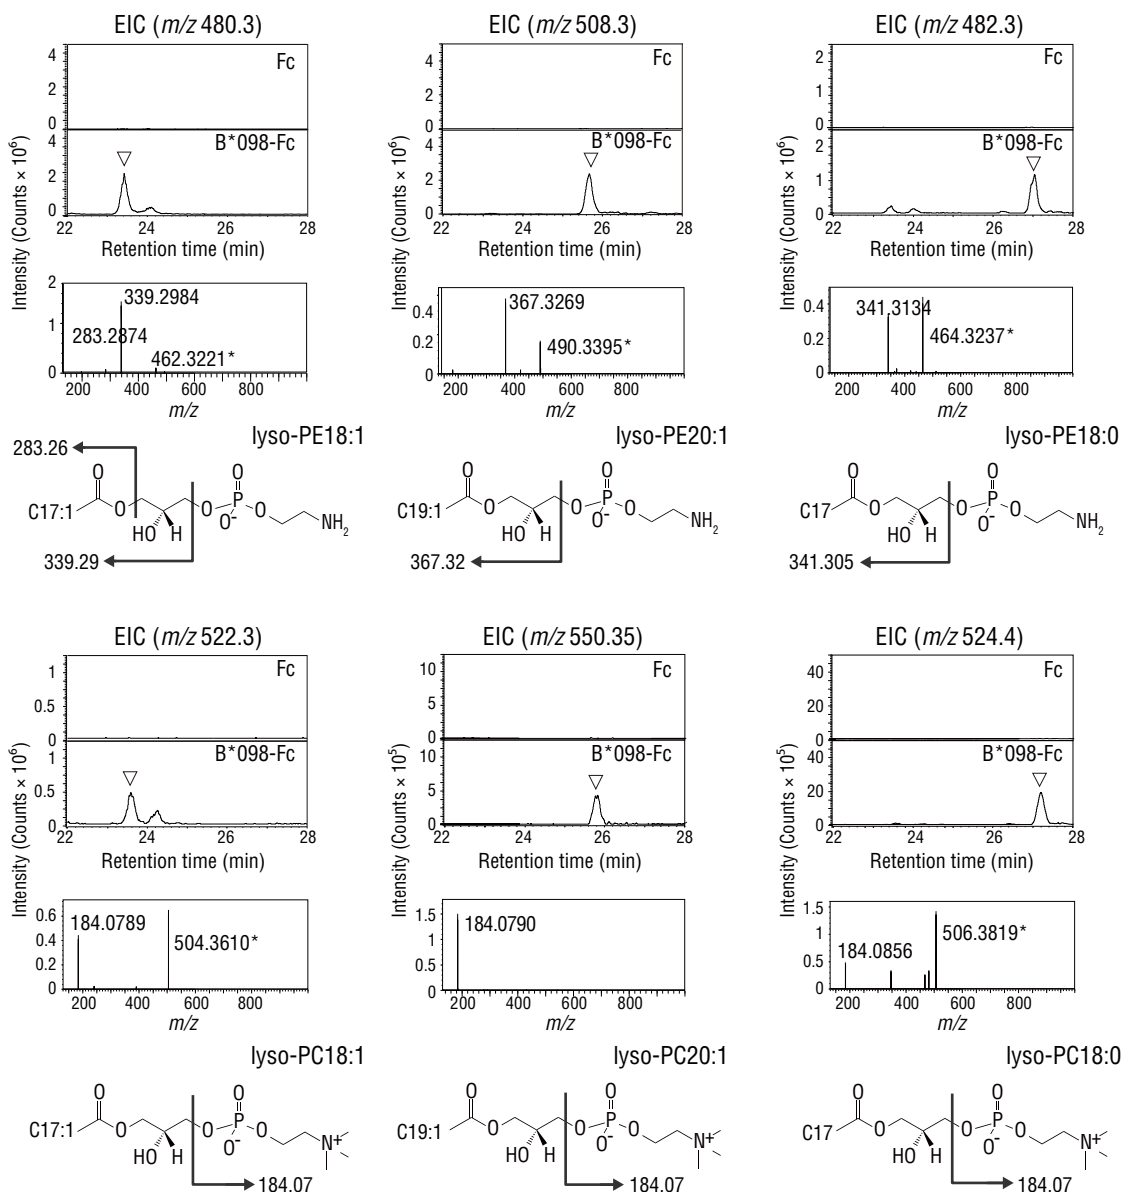

**Figure S1. LC-MS/MS analysis of ions associated with soluble Mamu-B\*098 proteins**

Samples extracted from Fc protein or B\*098-Fc proteins were analyzed by reversed-phase LC-MS/MS, as shown in Figure 1. The extracted ion chromatograms (EIC) are shown at the  $m/z$  values of ion pairs found in peaks 2, 3, and 4 in Figure 1B (each top panel), and the MS/MS spectra at the retention times indicated by open triangles are shown (each middle panel). The structures and MS/MS fragmentation of the corresponding lysophospholipids are also shown (each bottom panel). Asterisks indicate dehydrated ions.

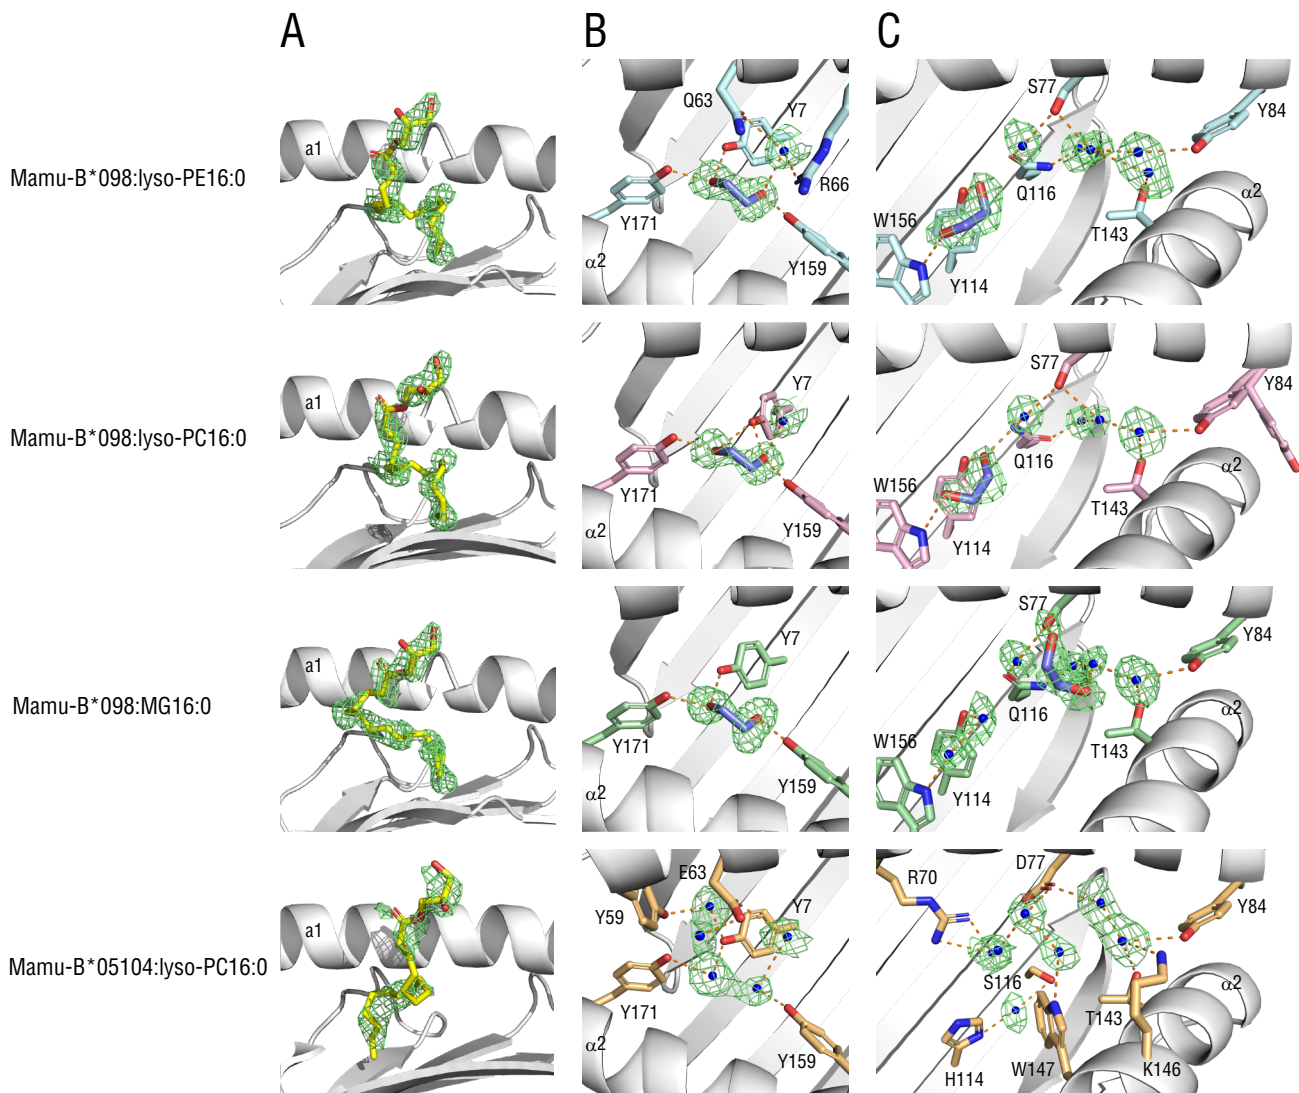

**Figure S2. Omit maps for bound ligands in the Ag-binding groove of Mamu-B\*098 and Mamu-B\*05104**

Side views of the B and D pockets (A), A pockets (B), and C, E, and F pockets (C) of Mamu-B\*098 complexed with lyso-PE16:0, lyso-PC16:0, and MG16:0 (left three panels) and Mamu-B\*05104 complexed with lyso-PC16:0 (right panels) are displayed with ribbon models of heavy chains. Fo-Fc omit maps (contoured at  $2.4\sigma$ ) for MG16:0 (yellow sticks), water molecules (blue sphere), and ethylene glycol (blue sticks) are also shown.

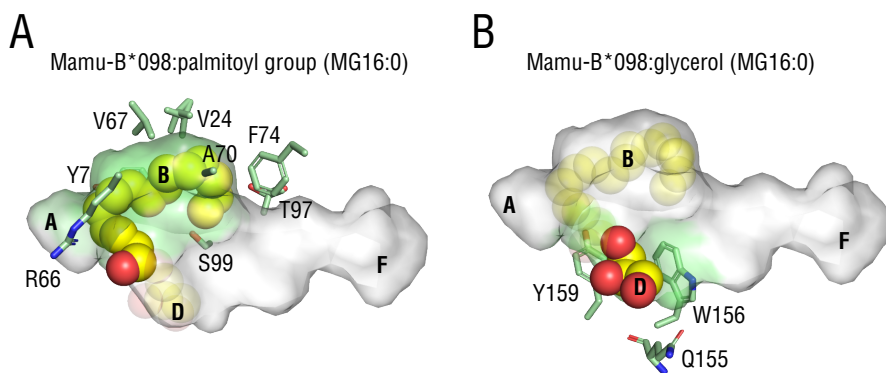

**Figure S3. Interactions with MG16:0 and Mamu-B\*098**

*A, B*, Top view images of the palmitoyl group (*A*) and glycerol moiety (*B*) of bound ligands (yellow sphere) are displayed with the semi-transparent antigen-binding groove of Mamu-B\*098 complexed with MG16:0. The side chains of amino acid residues surrounding the palmitoyl group in the colored B pocket (*A*) and surrounding the glycerol moiety in the colored D pocket (*B*) are shown.

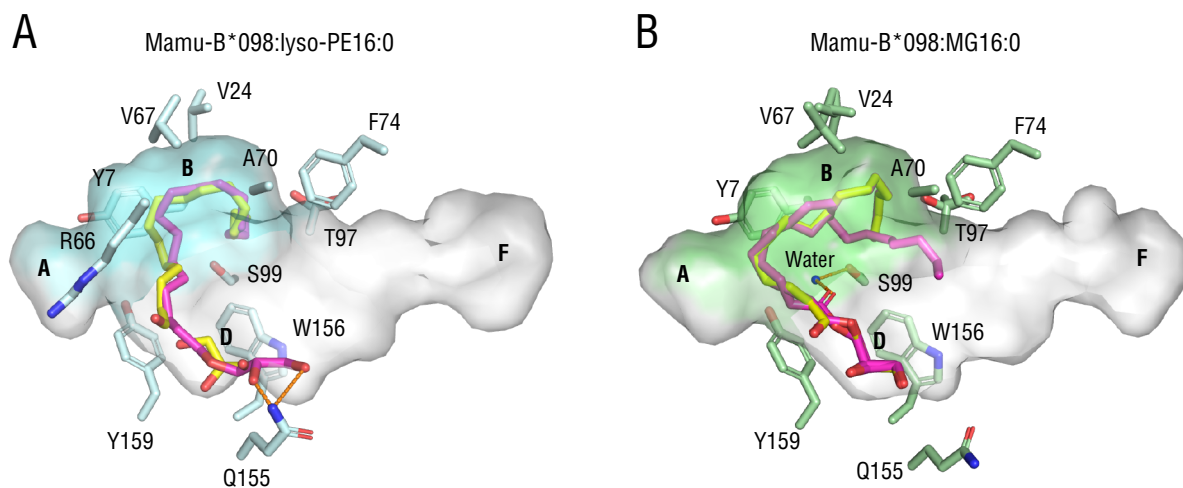

**Figure S4. Alternate conformations of bound ligands**

*A, B*, Top view images of Mamu-B\*098:lyso-PE16:0 (chain C-D, *A*) and Mamu-B\*098:MG16:0 (chain A-B, *B*). Bound ligands with an alternate conformation are displayed as magenta sticks. Ligands with a conformation as in Fig. 3 (lyso-PE16:0) and Fig. S3 (MG16:0) are also shown as a comparison (yellow sticks). Hydrogen bonds are displayed as dashed orange lines.

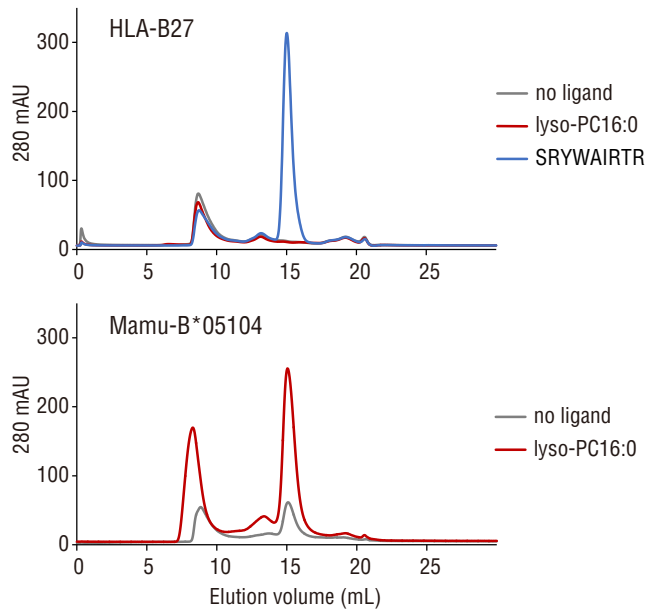

**Figure S5. Lysophospholipids failed to induce a refolding of the recombinant HLA-B27**

The recombinant HLA-B27 heavy chain (upper panel) was refolded with  $\beta$ 2m in a buffer system in the presence or absence of indicated ligands (lyso-PC16:0 or SRYWAIRTR; the influenza A virus NP peptide), and the refolded samples were analyzed by size-exclusion chromatography (GE healthcare, Superdex 200 Increase 10/300GL). The formation of the heavy chain: $\beta$ 2m:ligand trimer complex was monitored by an increase of A280 values at an elution volume of 15 ml. The recombinant Mamu-B\*05104 heavy chain (bottom) was also analyzed as a positive control to indicate the lyso-PC16:0-dependent protein refolding.
